# Supplementary material
Source: PubMed Central journal article supplement (PMC5711543)

# Emotional Reactivity Task

## Conscious Processing (F vs. N)

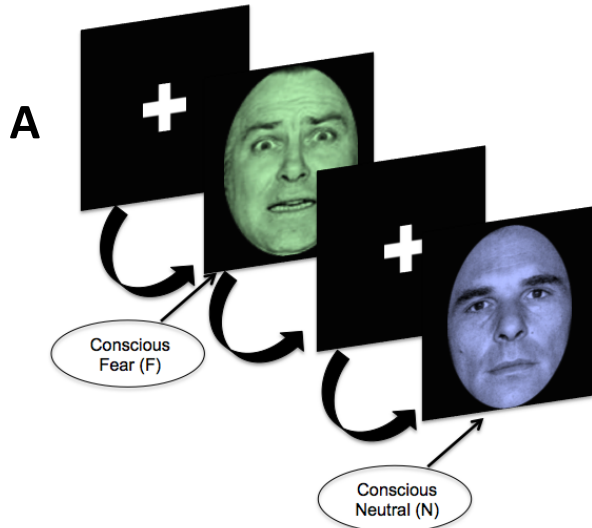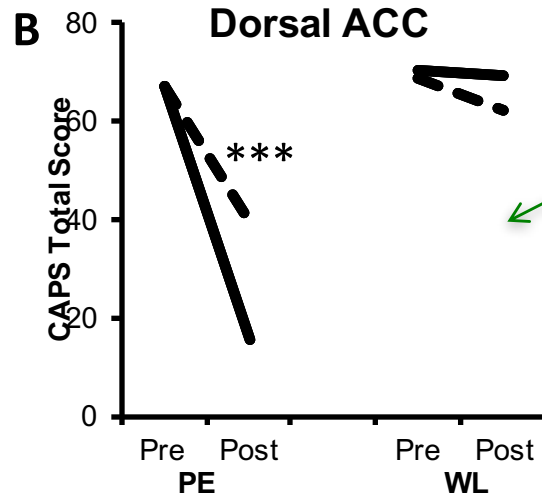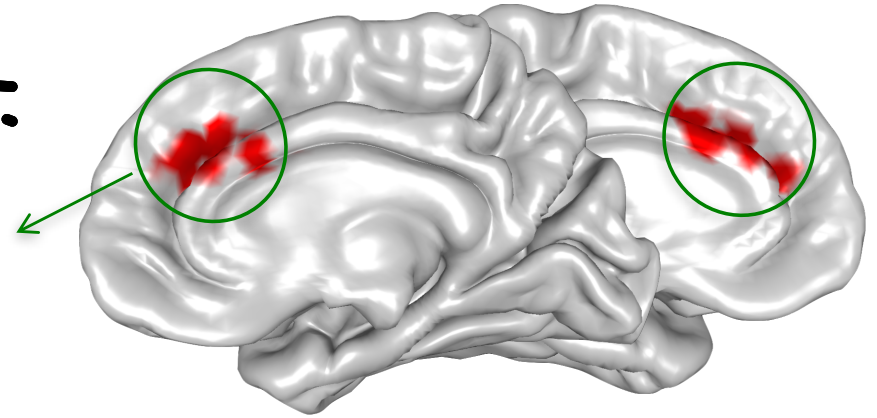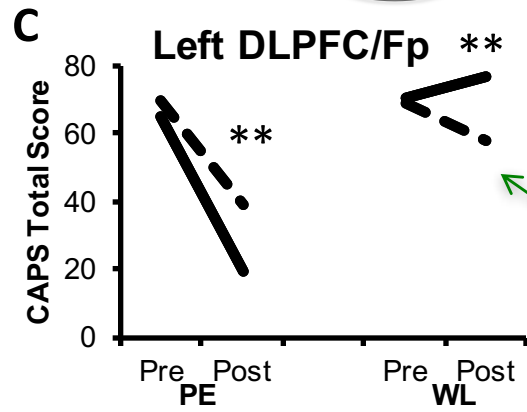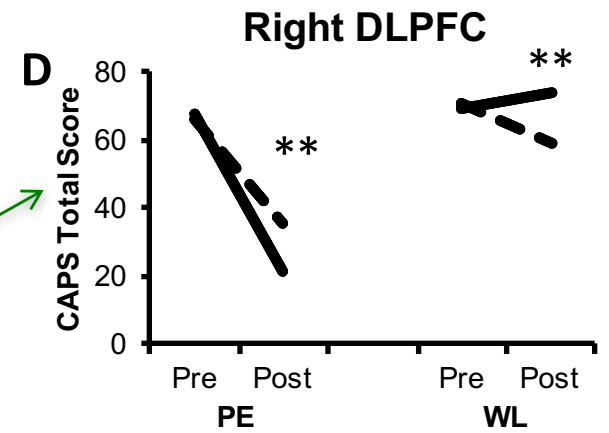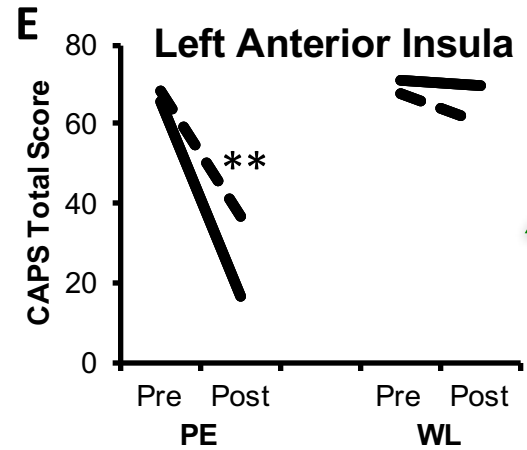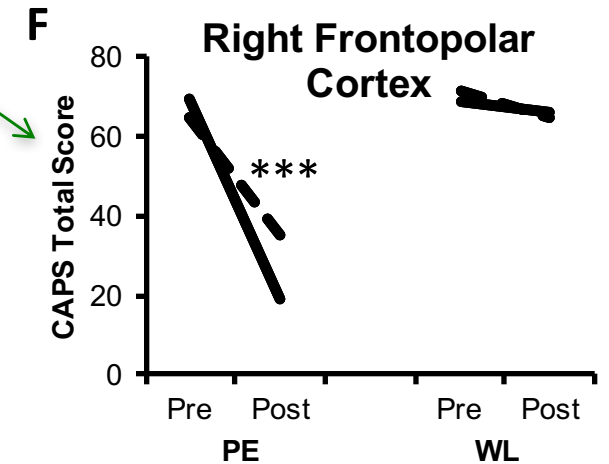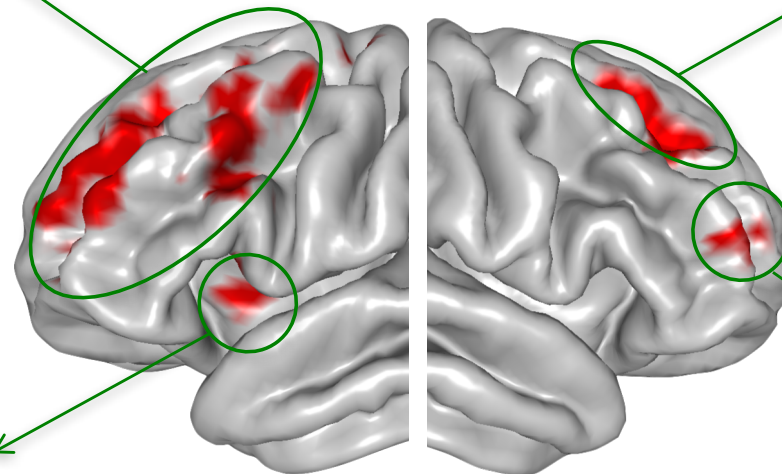

— Participants w/ moderator above median value

- - - Participants w/ moderator below median value

# Emotional Reactivity Task Conscious Processing (F vs. N)

**A** Functional Activation

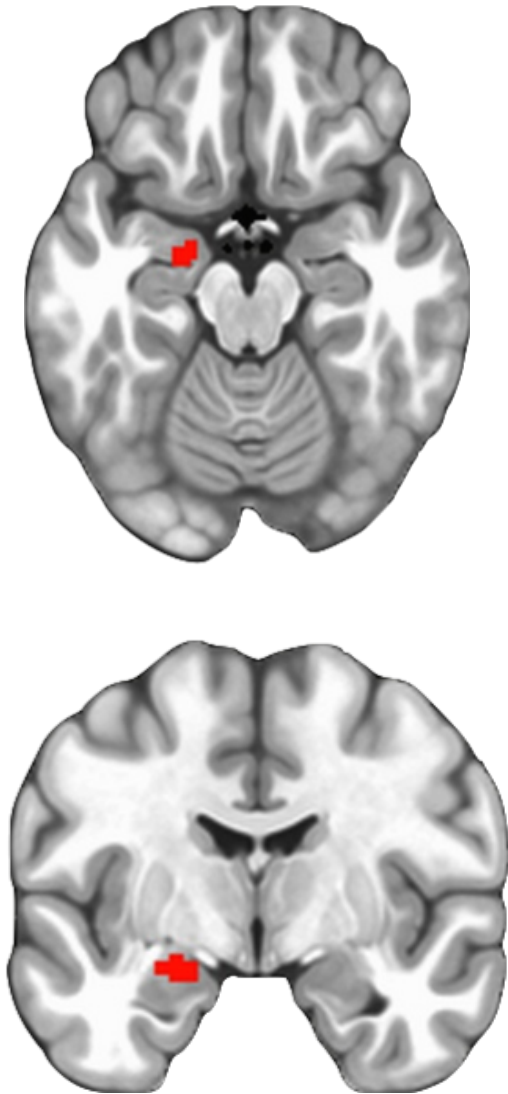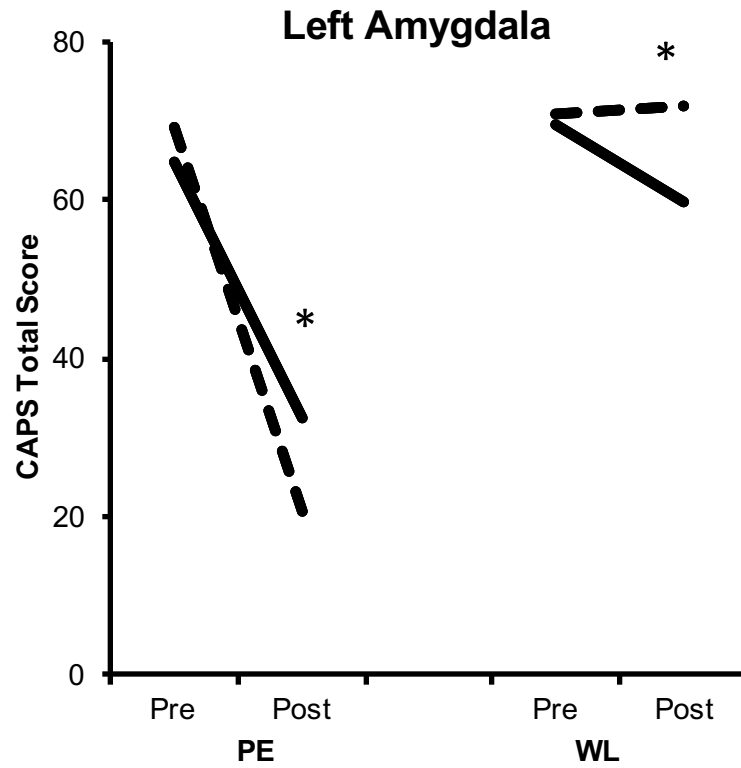

**B**

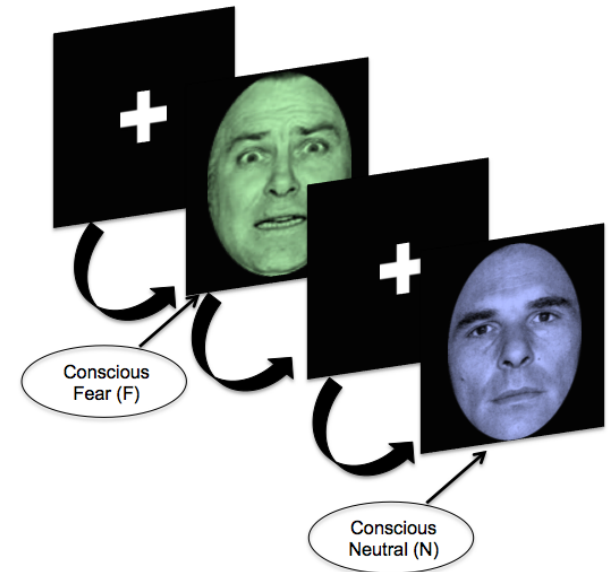

### Emotional Conflict Task Congruent Fear vs. Congruent Happy (Reactivity)

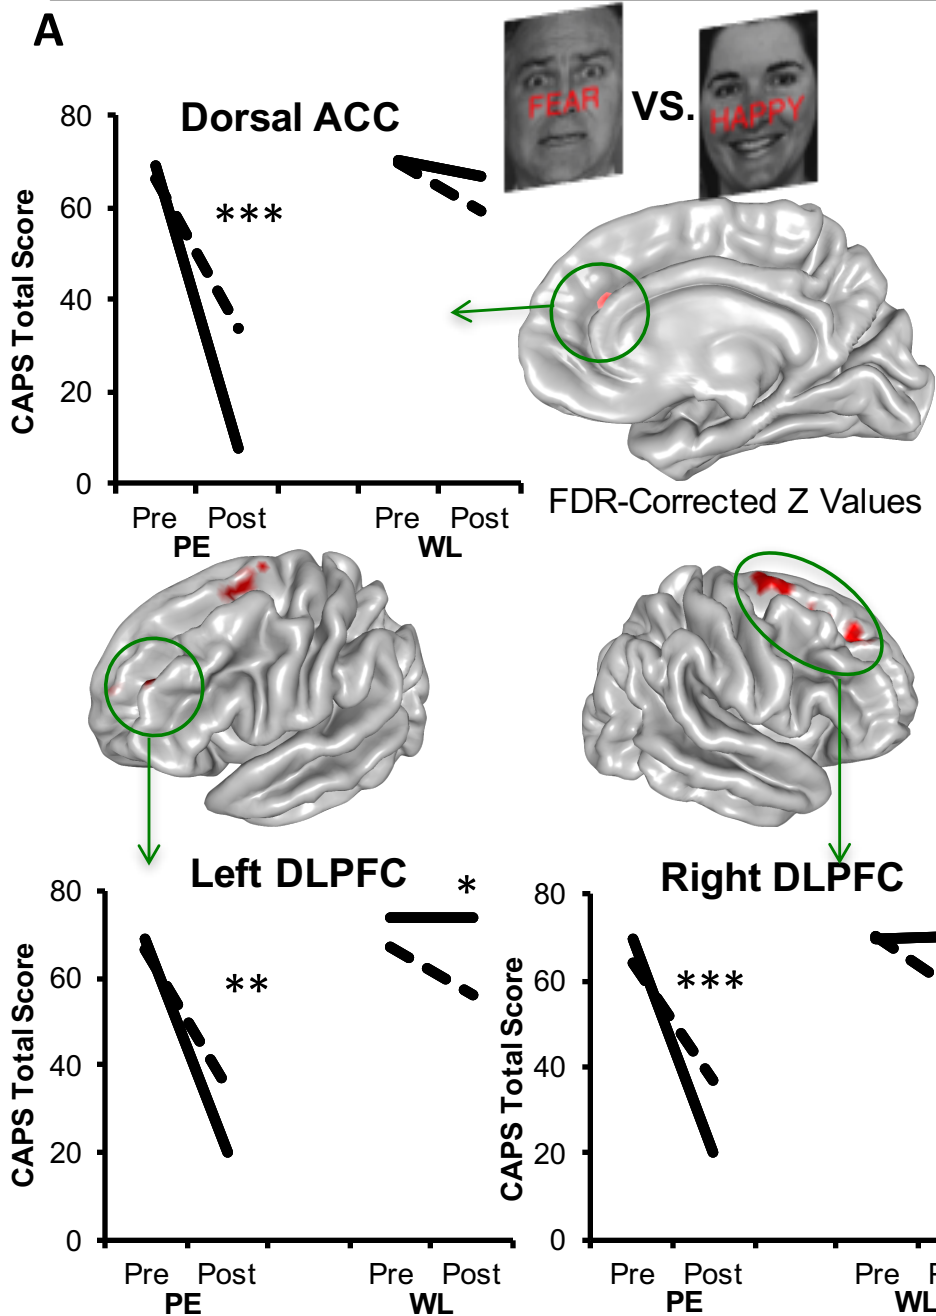

### Emotional Conflict Task Post-Inc Inc vs. Post-Con Inc (Conflict Regulation)

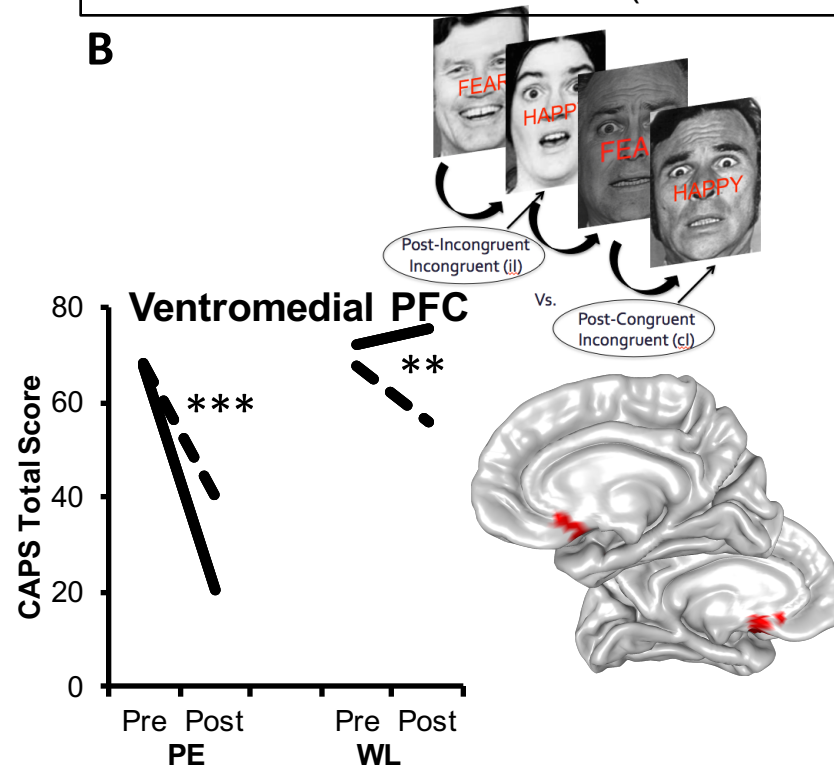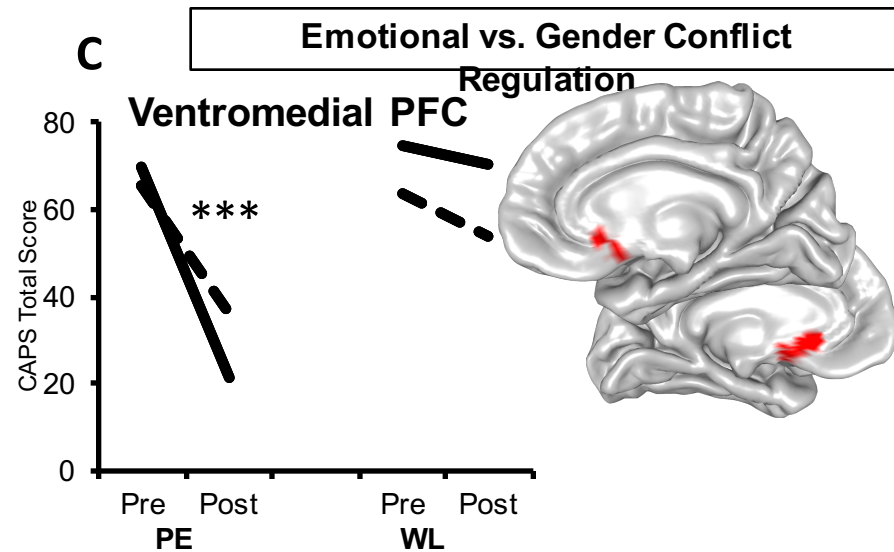

— Participants w/ moderator above median value      - - - Participants w/ moderator below median value

**Concurrent TMS-fMRI (Immediate Treatment only)**  
**Right pMFG (ECN) vs. Right aMFG (Saliency)**

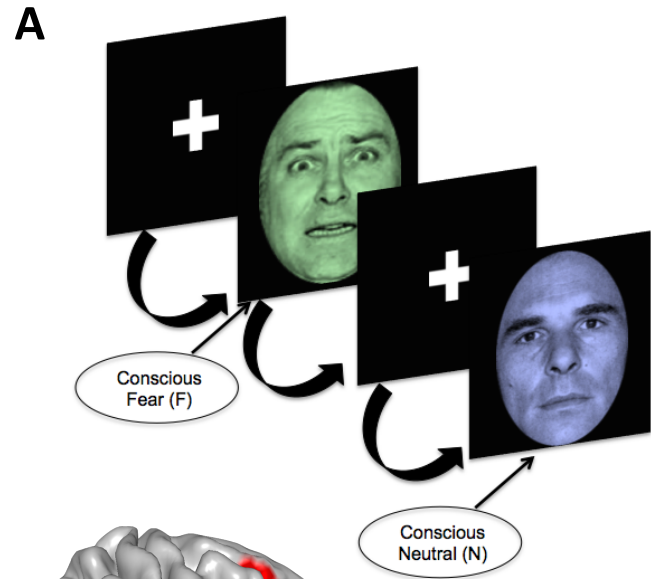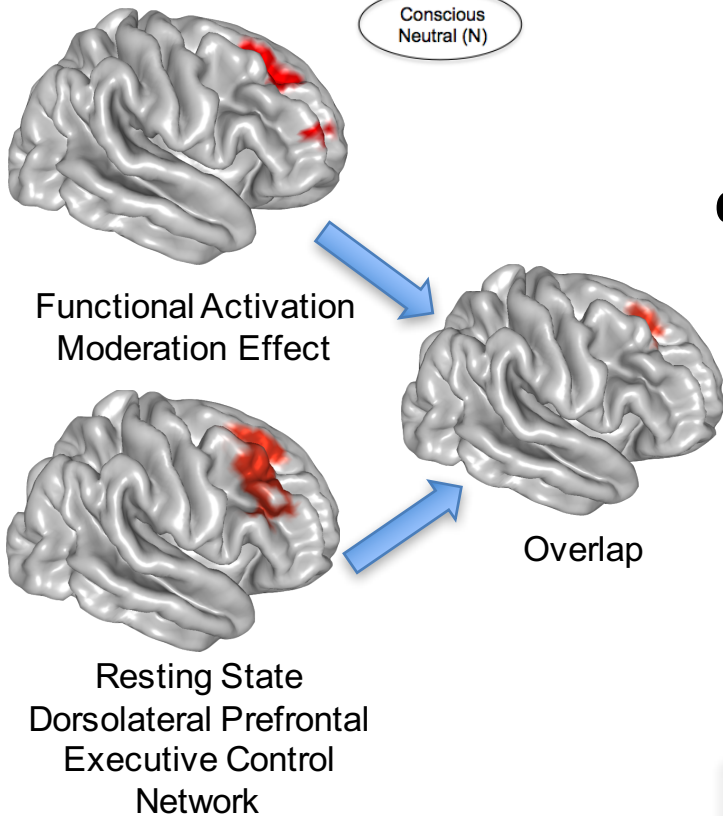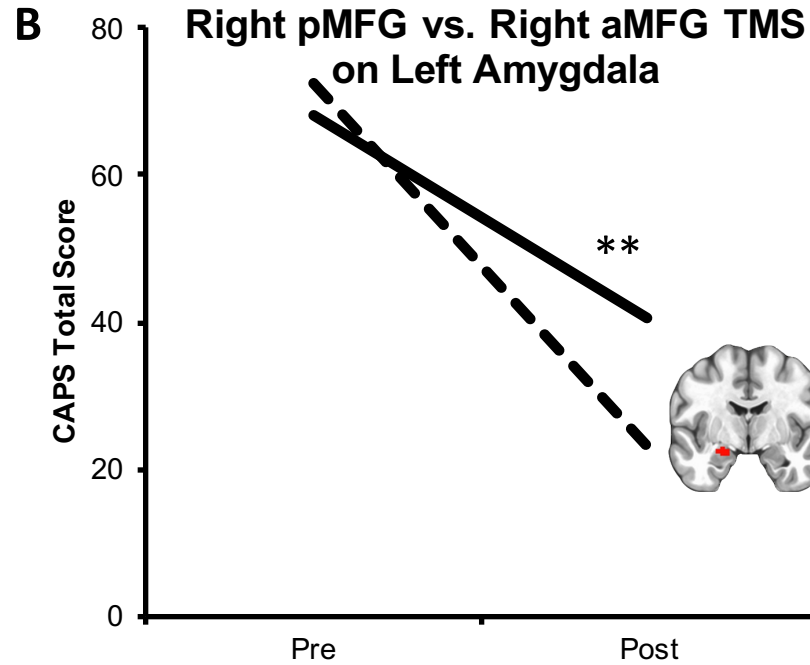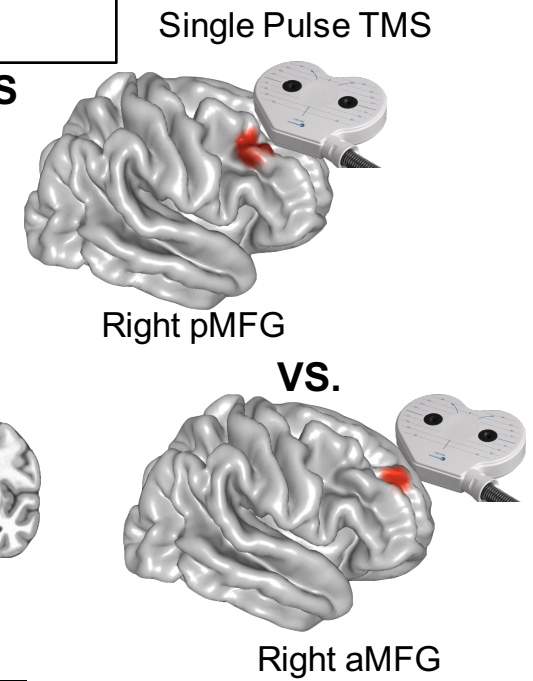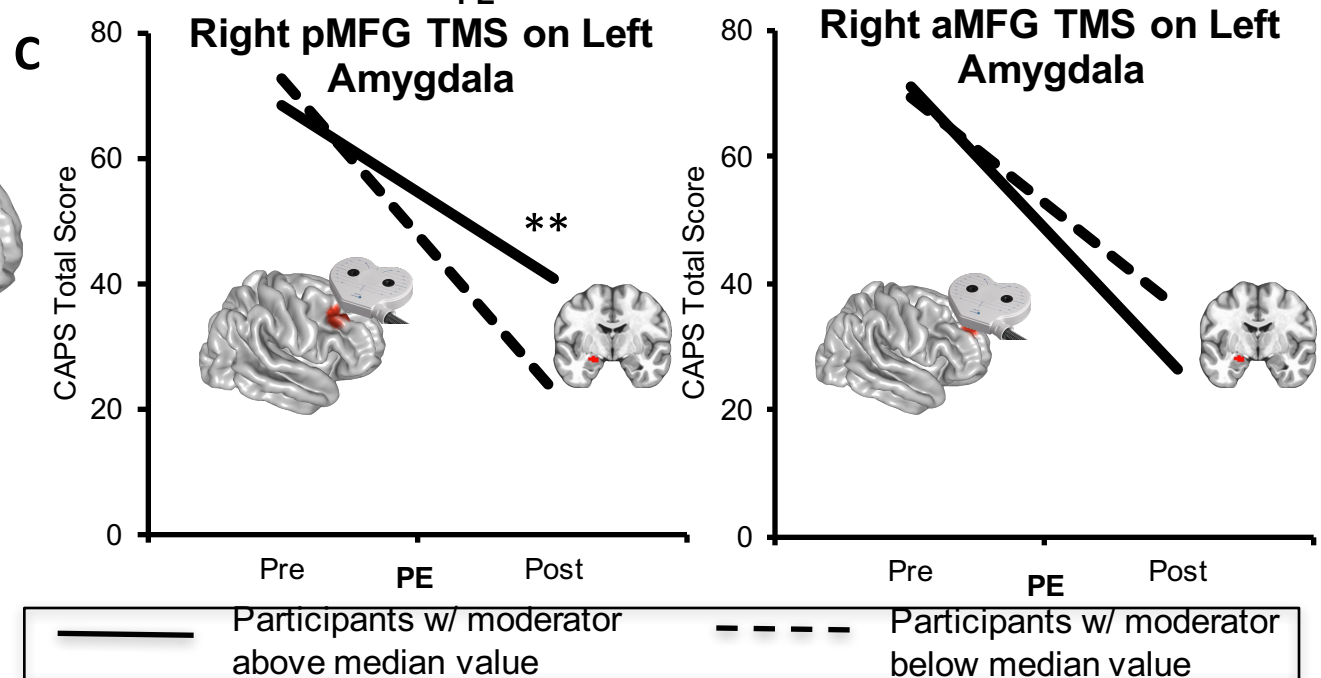

Supplement: NIHMS888914-supplement-Supplemental_figures.pdf [file NIHMS888914-supplement-Supplemental_figures.pdf]
